# Supplementary material for: Burden of injuries in Vietnam: emerging trends from a decade of economic achievement
Source: HighWire-hosted journal article supplement (doi:10.1136/injuryprev-2019-043352), 2020-01-08
Supplement: injuryprev-2019-043352supp003_data_supplement.pdf [file injuryprev-2019-043352supp003_data_supplement.pdf]

| Table 1: Age-standardised mortality and incidence rates in 2017 and percentage change from 2007 to 2017 by cause of injury in Vietnam |                                         |                                                                   |                                         |                                                                   |
|---------------------------------------------------------------------------------------------------------------------------------------|-----------------------------------------|-------------------------------------------------------------------|-----------------------------------------|-------------------------------------------------------------------|
| Cause                                                                                                                                 | Deaths (95% UI)                         |                                                                   | Incidence (95% UI)                      |                                                                   |
|                                                                                                                                       | 2017 age-standardised rates per 100,000 | Percentage change in age-standardised rates between 2007 and 2017 | 2017 age-standardised rates per 100,000 | Percentage change in age-standardised rates between 2007 and 2017 |
| <b>All injuries</b>                                                                                                                   | <b>68.2</b><br><b>(60.3 to 74.6)</b>    | <b>-11.6%</b><br><b>(-20.2% to -3.0%)</b>                         | <b>3 003</b><br><b>(2 851 to 3 181)</b> | <b>14.6%</b><br><b>(11.5% to 18.2%)</b>                           |
| <b>Transport injuries</b>                                                                                                             | <b>23.2</b><br><b>(19.7 to 26.1)</b>    | <b>-10.3%</b><br><b>(-23.0% to 1.4%)</b>                          | <b>1 001</b><br><b>(898 to 1 117)</b>   | <b>22.9%</b><br><b>(13.7% to 32.4%)</b>                           |
| Road injuries                                                                                                                         | 21.4<br>(18.2 to 24.2)                  | -11.0%<br>(-24.1% to 1.0%)                                        | 821<br>(718 to 932)                     | 27.3%<br>(15.7% to 39.3%)                                         |
| <i>Pedestrian road injuries</i>                                                                                                       | 8.6<br>(6.0 to 11.7)                    | -15.9%<br>(-28.8% to -3.8%)                                       | 172<br>(144 to 205)                     | 22.8%<br>(10.8% to 36.1%)                                         |
| <i>Cyclist road injuries</i>                                                                                                          | 1.1<br>(0.7 to 1.8)                     | 6.3%<br>(-13.4% to 29.2%)                                         | 145<br>(115 to 181)                     | 29.2%<br>(16.7% to 44.2%)                                         |
| <i>Motorcyclist road injuries</i>                                                                                                     | 4.2<br>(2.9 to 5.4)                     | -3.8%<br>(-24.6% to 20.9%)                                        | 186<br>(152 to 222)                     | 23.6%<br>(8.5% to 39.3%)                                          |
| <i>Motor vehicle road injuries</i>                                                                                                    | 7.1<br>(5.0 to 9.1)                     | -10.8%<br>(-26.3% to 5.7%)                                        | 239<br>(196 to 287)                     | 35.2%<br>(19.8% to 50.6%)                                         |
| <i>Other road injuries</i>                                                                                                            | 0.3<br>(0.2 to 0.6)                     | -14.9%<br>(-32.7% to 11.7%)                                       | 78<br>(59 to 100)                       | 21.0%<br>(9.3% to 33.5%)                                          |
| Other transport injuries                                                                                                              | 1.8<br>(1.2 to 2.4)                     | -0.8%<br>(-18.1% to 18.9%)                                        | 180<br>(151 to 215)                     | 6.3%<br>(1.1% to 11.1%)                                           |
| <b>Unintentional injuries</b>                                                                                                         | <b>36.0</b><br><b>(32.2 to 40.1)</b>    | <b>-13.0%</b><br><b>(-21.7% to -4.1%)</b>                         | <b>1 728</b><br><b>(1 629 to 1 827)</b> | <b>8.8%</b><br><b>(6.1% to 11.9%)</b>                             |
| Falls                                                                                                                                 | 18.0<br>(15.4 to 21.0)                  | 1.1%<br>(-13.3% to 17.2%)                                         | 592<br>(520 to 677)                     | 27.5%<br>(20.9% to 34.8%)                                         |
| Drowning                                                                                                                              | 7.7<br>(6.7 to 8.8)                     | -23.0%<br>(-32.2% to -12.6%)                                      | 6<br>(6 to 7)                           | -17.0%<br>(-22.8% to -10.3%)                                      |
| Fire, heat, and hot substances                                                                                                        | 0.6<br>(0.5 to 0.7)                     | -20.5%<br>(-30.7% to -9.7%)                                       | 39<br>(32 to 48)                        | 24.2%<br>(17.4% to 31.7%)                                         |
| Poisonings                                                                                                                            | 0.9<br>(0.4 to 1.3)                     | -29.1%<br>(-49.0% to -7.8%)                                       | 24<br>(19 to 31)                        | 6.7%<br>(-1.8% to 16.2%)                                          |
| <i>Poisoning by carbon monoxide</i>                                                                                                   | 0.1<br>(0.1 to 0.2)                     | -31.2%<br>(-53.8% to -4.3%)                                       | 8<br>(6 to 11)                          | 6.2%<br>(-5.2% to 17.3%)                                          |
| <i>Poisoning by other means</i>                                                                                                       | 0.8<br>(0.3 to 1.1)                     | -28.7%<br>(-48.8% to -6.9%)                                       | 16<br>(12 to 21)                        | 7.0%<br>(-2.2% to 16.6%)                                          |
| Exposure to mechanical forces                                                                                                         | 2.9<br>(2.4 to 3.4)                     | -34.6%<br>(-45.0% to -18.1%)                                      | 437<br>(386 to 494)                     | 3.9%<br>(-1.7% to 10.1%)                                          |
| <i>Unintentional firearm injuries</i>                                                                                                 | 0.3<br>(0.2 to 0.4)                     | -41.5%<br>(-56.8% to -16.9%)                                      | 20<br>(15 to 26)                        | -1.3%<br>(-10.5% to 9.1%)                                         |
| <i>Other exposure to mechanical forces</i>                                                                                            | 2.6<br>(2.2 to 3.1)                     | -33.6%<br>(-43.4% to -17.8%)                                      | 417<br>(368 to 470)                     | 4.2%<br>(-1.4% to 10.4%)                                          |
| Adverse effects of medical treatment                                                                                                  | 1.2<br>(1.0 to 1.4)                     | -14.6%<br>(-26.4% to 2.1%)                                        | 114<br>(97 to 133)                      | 4.2%<br>(-1.1% to 10.1%)                                          |
| Animal contact                                                                                                                        | 0.7<br>(0.5 to 0.9)                     | -13.6%<br>(-26.3% to -0.2%)                                       | 130<br>(110 to 154)                     | -13.3%<br>(-17.1% to -9.3%)                                       |
| <i>Venomous animal contact</i>                                                                                                        | 0.5<br>(0.3 to 0.7)                     | -13.5%<br>(-27.0% to 3.3%)                                        | 56<br>(45 to 69)                        | -11.3%<br>(-15.1% to -7.2%)                                       |
| <i>Non-venomous animal contact</i>                                                                                                    | 0.2<br>(0.1 to 0.3)                     | -13.7%<br>(-30.8% to 5.8%)                                        | 73<br>(60 to 91)                        | -14.8%<br>(-18.8% to -10.5%)                                      |
| Foreign body                                                                                                                          | 1.6<br>(1.4 to 1.9)                     | -7.8%<br>(-21.7% to 7.5%)                                         | 122<br>(102 to 143)                     | 4.1%<br>(0.9% to 7.8%)                                            |
| <i>Pulmonary aspiration and foreign body in airway</i>                                                                                | 1.4<br>(1.2 to 1.7)                     | -7.4%<br>(-21.8% to 8.8%)                                         | 9<br>(7 to 11)                          | 18.1%<br>(5.5% to 30.4%)                                          |
| <i>Foreign body in eyes</i>                                                                                                           | --                                      | --                                                                | 77<br>(58 to 97)                        | 2.3%<br>(-1.7% to 7.3%)                                           |
| <i>Foreign body in other body part</i>                                                                                                | 0.2<br>(0.1 to 0.3)                     | -10.7%<br>(-27.6% to 10.7%)                                       | 37<br>(30 to 45)                        | 5.2%<br>(0.4% to 9.4%)                                            |
| Environmental heat and cold exposure                                                                                                  | 0.1<br>(0.0 to 0.1)                     | -29.0%<br>(-41.2% to -12.6%)                                      | 32<br>(26 to 40)                        | 9.7%<br>(5.5% to 14.0%)                                           |
| Exposure to forces of nature                                                                                                          | 0.2<br>(0.2 to 0.2)                     | -47.1%<br>(-54.6% to -37.9%)                                      | 11<br>(10 to 13)                        | -47.1%<br>(-47.1% to -47.1%)                                      |
| Other unintentional injuries                                                                                                          | 2.1<br>(1.6 to 2.4)                     | -21.6%<br>(-36.8% to -4.1%)                                       | 220<br>(191 to 252)                     | 2.9%<br>(-2.6% to 8.2%)                                           |
| <b>Self-harm and interpersonal violence</b>                                                                                           | <b>8.9</b><br><b>(7.3 to 10.3)</b>      | <b>-8.6%</b><br><b>(-21.8% to 5.4%)</b>                           | <b>274</b><br><b>(237 to 316)</b>       | <b>25.7%</b><br><b>(16.2% to 36.7%)</b>                           |
| Self-harm                                                                                                                             | 7.4<br>(6.1 to 8.6)                     | -6.5%<br>(-18.9% to 6.9%)                                         | 21<br>(18 to 24)                        | 5.0%<br>(-2.1% to 13.8%)                                          |
| <i>Self-harm by firearm</i>                                                                                                           | 0.2<br>(0.1 to 0.3)                     | -12.9%<br>(-31.3% to 8.7%)                                        | 0<br>(0 to 1)                           | 4.3%<br>(-13.9% to 24.4%)                                         |
| <i>Self-harm by other specified means</i>                                                                                             | 7.2<br>(6.0 to 8.4)                     | -6.4%<br>(-18.7% to 7.0%)                                         | 20<br>(18 to 23)                        | 5.0%<br>(-2.2% to 13.8%)                                          |
| Interpersonal violence                                                                                                                | 1.5<br>(1.0 to 2.0)                     | -17.7%<br>(-40.9% to 7.6%)                                        | 251<br>(213 to 293)                     | 28.3%<br>(17.6% to 40.1%)                                         |
| <i>Assault by firearm</i>                                                                                                             | 0.1<br>(0.1 to 0.2)                     | -17.2%<br>(-47.9% to 22.3%)                                       | 5<br>(3 to 7)                           | 56.9%<br>(39.4% to 77.7%)                                         |
| <i>Assault by sharp object</i>                                                                                                        | 1.0<br>(0.5 to 1.4)                     | -16.0%<br>(-42.6% to 15.4%)                                       | 70<br>(54 to 88)                        | 18.0%<br>(4.9% to 32.6%)                                          |
| <i>Assault by other means</i>                                                                                                         | 0.4<br>(0.3 to 0.6)                     | -21.6%<br>(-46.6% to 5.8%)                                        | 176<br>(149 to 208)                     | 32.2%<br>(21.5% to 44.1%)                                         |
| Conflict and terrorism                                                                                                                | 0.0<br>(0.0 to 0.0)                     | --                                                                | 0<br>(0 to 0)                           | --                                                                |

| Cause                          | Deaths (95% UI)                         |                                                                   | Incidence (95% UI)                      |                                                                   |
|--------------------------------|-----------------------------------------|-------------------------------------------------------------------|-----------------------------------------|-------------------------------------------------------------------|
|                                | 2017 age-standardised rates per 100,000 | Percentage change in age-standardised rates between 2007 and 2017 | 2017 age-standardised rates per 100,000 | Percentage change in age-standardised rates between 2007 and 2017 |
| Executions and police conflict | 0.0<br>(0.0 to 0.0)                     | -9.2%<br>(-38.5% to 35.5%)                                        | 3<br>(2 to 4)                           | -7.1%<br>(-36.7% to 38.1%)                                        |
