# Supplementary material for: Burden of injuries in Vietnam: emerging trends from a decade of economic achievement
Source: HighWire-hosted journal article supplement (doi:10.1136/injuryprev-2019-043352), 2020-01-08
Supplement: injuryprev-2019-043352supp004_data_supplement.pdf [file injuryprev-2019-043352supp004_data_supplement.pdf]

| Cause                                           | Table 2: Age-standardised YLL, YLD, and DALY rates in 2017 and percentage change from 2007 to 2017 by cause of injury in Vietnam |                                                                   |                                         |                                                                   |                                         |                                                                   |  |
|-------------------------------------------------|----------------------------------------------------------------------------------------------------------------------------------|-------------------------------------------------------------------|-----------------------------------------|-------------------------------------------------------------------|-----------------------------------------|-------------------------------------------------------------------|--|
|                                                 | YLLs (95% UI)                                                                                                                    |                                                                   |                                         | YLDs (95% UI)                                                     |                                         | DALYs (95% UI)                                                    |  |
|                                                 | 2017 age-standardised rates per 100,000                                                                                          | Percentage change in age-standardised rates between 2007 and 2017 | 2017 age-standardised rates per 100,000 | Percentage change in age-standardised rates between 2007 and 2017 | 2017 age-standardised rates per 100,000 | Percentage change in age-standardised rates between 2007 and 2017 |  |
| <b>All injuries</b>                             | <b>2 559</b><br>(2 220 to 2 820)                                                                                                 | <b>-17.4%</b><br>(-27.0% to -7.5%)                                | <b>374</b><br>(275 to 494)              | <b>8.3%</b><br>(5.1% to 11.5%)                                    | <b>2 933</b><br>(2 578 to 3 225)        | <b>-14.8%</b><br>(-23.8% to -6.0%)                                |  |
| <b>Transport injuries</b>                       | <b>1 007</b><br>(832 to 1 141)                                                                                                   | <b>-13.3%</b><br>(-27.0% to -0.5%)                                | <b>190</b><br>(136 to 254)              | <b>11.9%</b><br>(8.6% to 15.4%)                                   | <b>1 197</b><br>(1 022 to 1 341)        | <b>-10.0%</b><br>(-22.3% to 1.2%)                                 |  |
| Road injuries                                   | 931<br>(769 to 1 059)                                                                                                            | -13.9%<br>(-27.7% to -1.3%)                                       | 139<br>(99 to 186)                      | 18.8%<br>(15.6% to 22.1%)                                         | 1 069<br>(912 to 1 205)                 | -10.8%<br>(-23.7% to 0.9%)                                        |  |
| Pedestrian road injuries                        | 318<br>(214 to 446)                                                                                                              | -20.9%<br>(-34.0% to -8.0%)                                       | 36<br>(25 to 49)                        | 13.7%<br>(10.1% to 17.3%)                                         | 354<br>(248 to 485)                     | -18.3%<br>(-31.0% to -6.4%)                                       |  |
| Cyclist road injuries                           | 46<br>(27 to 73)                                                                                                                 | 1.7%<br>(-17.3% to 23.4%)                                         | 19<br>(13 to 26)                        | 20.7%<br>(17.0% to 24.9%)                                         | 65<br>(44 to 94)                        | 6.6%<br>(-9.0% to 22.6%)                                          |  |
| Motorcyclist road injuries                      | 225<br>(156 to 287)                                                                                                              | -5.7%<br>(-27.4% to 21.0%)                                        | 41<br>(28 to 57)                        | 14.8%<br>(10.7% to 18.9%)                                         | 266<br>(196 to 329)                     | -3.0%<br>(-22.3% to 19.9%)                                        |  |
| Motor vehicle road injuries                     | 328<br>(234 to 411)                                                                                                              | -13.5%<br>(-29.5% to 4.0%)                                        | 33<br>(24 to 45)                        | 30.5%<br>(26.4% to 34.7%)                                         | 361<br>(264 to 448)                     | -10.7%<br>(-26.2% to 6.0%)                                        |  |
| Other road injuries                             | 14<br>(8 to 24)                                                                                                                  | -17.5%<br>(-36.1% to 10.3%)                                       | 9<br>(6 to 12)                          | 15.2%<br>(11.3% to 18.7%)                                         | 23<br>(16 to 33)                        | -7.0%<br>(-24.0% to 11.9%)                                        |  |
| Other transport injuries                        | 76<br>(50 to 108)                                                                                                                | -4.0%<br>(-23.0% to 18.8%)                                        | 51<br>(36 to 69)                        | -3.1%<br>(-6.7% to 0.8%)                                          | 127<br>(98 to 161)                      | -3.6%<br>(-15.7% to 10.0%)                                        |  |
| <b>Unintentional injuries</b>                   | <b>1 178</b><br>(1 040 to 1 318)                                                                                                 | <b>-22.4%</b><br>(-31.5% to -13.3%)                               | <b>141</b><br>(101 to 190)              | <b>3.1%</b><br>(-0.6% to 6.4%)                                    | <b>1 320</b><br>(1 168 to 1 473)        | <b>-20.3%</b><br>(-28.6% to -12.1%)                               |  |
| Falls                                           | 327<br>(282 to 381)                                                                                                              | -27.7%<br>(-45.4% to -11.8%)                                      | 59<br>(42 to 81)                        | 21.1%<br>(17.0% to 24.8%)                                         | 387<br>(338 to 445)                     | 0.4%<br>(-11.0% to 12.9%)                                         |  |
| Drowning                                        | 433<br>(367 to 508)                                                                                                              | -28.4%<br>(-38.5% to -15.8%)                                      | 2<br>(2 to 3)                           | -26.1%<br>(-29.6% to -23.1%)                                      | 435<br>(369 to 510)                     | -28.4%<br>(-38.4% to -15.8%)                                      |  |
| Fire, heat, and hot substances                  | 22<br>(18 to 28)                                                                                                                 | -25.1%<br>(-37.3% to -11.9%)                                      | 13<br>(9 to 18)                         | -8.9%<br>(-18.1% to 0.5%)                                         | 35<br>(29 to 42)                        | -20.0%<br>(-29.5% to -9.6%)                                       |  |
| Poisonings                                      | 38<br>(18 to 53)                                                                                                                 | -29.8%<br>(-49.7% to -7.8%)                                       | 2<br>(1 to 2)                           | 11.1%<br>(-1.6% to 24.4%)                                         | 39<br>(20 to 54)                        | -28.8%<br>(-48.5% to -6.9%)                                       |  |
| Poisoning by carbon monoxide                    | 6<br>(3 to 9)                                                                                                                    | -30.7%<br>(-54.3% to -2.9%)                                       | 0<br>(0 to 1)                           | 10.6%<br>(-2.0% to 23.7%)                                         | 6<br>(3 to 9)                           | -25.0%<br>(-51.9% to -2.3%)                                       |  |
| Poisoning by other means                        | 31<br>(15 to 44)                                                                                                                 | -29.7%<br>(-50.1% to -7.3%)                                       | 1<br>(1 to 2)                           | 11.3%<br>(-1.4% to 25.5%)                                         | 33<br>(16 to 45)                        | -28.7%<br>(-48.8% to -7.0%)                                       |  |
| Exposure to mechanical forces                   | 130<br>(108 to 151)                                                                                                              | -36.0%<br>(-46.5% to -18.8%)                                      | 28<br>(19 to 38)                        | -4.9%<br>(-8.6% to -1.1%)                                         | 157<br>(133 to 180)                     | -32.1%<br>(-41.8% to -16.7%)                                      |  |
| Unintentional firearm injuries                  | 15<br>(10 to 20)                                                                                                                 | -42.0%<br>(-56.4% to -17.6%)                                      | 4<br>(3 to 5)                           | -8.3%<br>(-11.9% to -4.9%)                                        | 19<br>(14 to 24)                        | -37.7%<br>(-50.9% to -16.5%)                                      |  |
| Other exposure to mechanical forces             | 115<br>(95 to 134)                                                                                                               | -35.1%<br>(-45.6% to -18.6%)                                      | 24<br>(17 to 34)                        | -4.3%<br>(-8.3% to -0.4%)                                         | 139<br>(117 to 161)                     | -31.3%<br>(-40.9% to -16.6%)                                      |  |
| Adverse effects of medical treatment            | 40<br>(33 to 48)                                                                                                                 | -14.4%<br>(-25.6% to -1.9%)                                       | 1<br>(1 to 2)                           | 4.2%<br>(-1.0% to 10.0%)                                          | 41<br>(34 to 49)                        | -13.9%<br>(-25.0% to -1.8%)                                       |  |
| Animal contact                                  | 24<br>(18 to 30)                                                                                                                 | -16.9%<br>(-29.3% to -3.6%)                                       | 3<br>(2 to 5)                           | -12.0%<br>(-20.4% to -3.0%)                                       | 28<br>(21 to 33)                        | -16.4%<br>(-27.0% to -4.3%)                                       |  |
| Venomous animal contact                         | 17<br>(11 to 21)                                                                                                                 | -17.8%<br>(-29.1% to -3.4%)                                       | 2<br>(1 to 3)                           | -7.4%<br>(-19.6% to 6.3%)                                         | 19<br>(13 to 23)                        | -16.7%<br>(-27.2% to -3.8%)                                       |  |
| Non-venomous animal contact                     | 8<br>(6 to 12)                                                                                                                   | -15.0%<br>(-32.7% to 7.5%)                                        | 1<br>(1 to 2)                           | -20.7%<br>(-25.0% to -16.8%)                                      | 9<br>(6 to 13)                          | -15.7%<br>(-31.5% to 3.0%)                                        |  |
| Foreign body                                    | 59<br>(46 to 76)                                                                                                                 | -19.2%<br>(-38.1% to 5.7%)                                        | 6<br>(4 to 8)                           | -3.5%<br>(-7.7% to 0.7%)                                          | 65<br>(52 to 82)                        | -18.0%<br>(-35.7% to 5.0%)                                        |  |
| Pulmonary aspiration and foreign body in airway | 54<br>(41 to 70)                                                                                                                 | -19.2%<br>(-38.6% to 7.0%)                                        | 1<br>(1 to 2)                           | 1.1%<br>(-5.3% to 7.9%)                                           | 55<br>(42 to 71)                        | -18.8%<br>(-38.0% to 6.9%)                                        |  |
| Foreign body in eyes                            | --                                                                                                                               | --                                                                | 1<br>(0 to 1)                           | 1.9%<br>(-1.9% to 6.4%)                                           | 1<br>(0 to 1)                           | 1.9%<br>(-1.9% to 6.4%)                                           |  |
| Foreign body in other body part                 | 5<br>(3 to 8)                                                                                                                    | -19.9%<br>(-41.0% to 7.0%)                                        | 4<br>(3 to 5)                           | -6.0%<br>(-10.9% to -1.2%)                                        | 9<br>(7 to 13)                          | -14.2%<br>(-27.7% to 1.5%)                                        |  |
| Environmental heat and cold exposure            | 2<br>(1 to 2)                                                                                                                    | -29.8%<br>(-43.7% to -13.8%)                                      | 5<br>(4 to 7)                           | -3.4%<br>(-7.5% to 0.8%)                                          | 7<br>(5 to 9)                           | -12.2%<br>(-19.3% to -5.9%)                                       |  |
| Exposure to forces of nature                    | 10<br>(9 to 12)                                                                                                                  | -47.1%<br>(-55.8% to -36.6%)                                      | 4<br>(3 to 6)                           | -24.3%<br>(-28.9% to -19.6%)                                      | 15<br>(13 to 17)                        | -41.8%<br>(-49.3% to -33.6%)                                      |  |
| Other unintentional injuries                    | 93<br>(71 to 110)                                                                                                                | -23.0%<br>(-39.1% to -4.5%)                                       | 18<br>(12 to 25)                        | -3.3%<br>(-6.4% to 0.2%)                                          | 110<br>(89 to 129)                      | -20.4%<br>(-34.6% to -4.3%)                                       |  |
| <b>Self-harm and interpersonal violence</b>     | <b>374</b><br>(301 to 435)                                                                                                       | <b>-10.5%</b><br>(-24.9% to 4.4%)                                 | <b>43</b><br>(33 to 54)                 | <b>11.1%</b><br>(7.8% to 14.9%)                                   | <b>417</b><br>(343 to 478)              | <b>-8.6%</b><br>(-22.1% to 5.1%)                                  |  |
| Self-harm                                       | 298<br>(242 to 345)                                                                                                              | -8.1%<br>(-22.3% to 6.5%)                                         | 3<br>(2 to 3)                           | -8.0%<br>(-12.7% to -3.4%)                                        | 301<br>(244 to 348)                     | -8.1%<br>(-22.2% to 6.4%)                                         |  |
| Self-harm by firearm                            | 8<br>(4 to 13)                                                                                                                   | -13.3%<br>(-33.8% to 10.5%)                                       | 0<br>(0 to 0)                           | -2.1%<br>(-6.5% to 2.6%)                                          | 8<br>(4 to 13)                          | -13.2%<br>(-33.6% to 10.4%)                                       |  |
| Self-harm by other specified means              | 290<br>(236 to 336)                                                                                                              | -8.0%<br>(-22.3% to 7.0%)                                         | 3<br>(2 to 3)                           | -8.1%<br>(-12.9% to -3.5%)                                        | 293<br>(239 to 339)                     | -8.0%<br>(-22.1% to 6.9%)                                         |  |
| Interpersonal violence                          | 76<br>(48 to 103)                                                                                                                | -18.8%<br>(-42.9% to 8.7%)                                        | 40<br>(31 to 51)                        | 13.0%<br>(9.5% to 16.8%)                                          | 115<br>(85 to 143)                      | -10.0%<br>(-27.6% to 10.0%)                                       |  |
| Assault by firearm                              | 5<br>(3 to 9)                                                                                                                    | -18.1%<br>(-50.1% to 23.5%)                                       | 1<br>(1 to 1)                           | 45.3%<br>(36.9% to 53.9%)                                         | 6<br>(4 to 10)                          | -11.3%<br>(-41.0% to 25.6%)                                       |  |
| Assault by sharp object                         | 51<br>(28 to 74)                                                                                                                 | -16.8%<br>(-44.6% to 17.0%)                                       | 8<br>(6 to 11)                          | 10.1%<br>(5.2% to 14.7%)                                          | 59<br>(36 to 82)                        | -14.0%<br>(-38.9% to 16.3%)                                       |  |
| Sexual violence                                 | --                                                                                                                               | --                                                                | 15<br>(10 to 22)                        | 5.8%<br>(1.2% to 10.3%)                                           | 15<br>(10 to 22)                        | 5.8%<br>(1.2% to 10.3%)                                           |  |
| Assault by other means                          | 18<br>(12 to 28)                                                                                                                 | -24.1%<br>(-49.7% to 3.8%)                                        | 16<br>(11 to 22)                        | 20.3%<br>(14.9% to 25.5%)                                         | 35<br>(26 to 45)                        | -8.3%<br>(-26.3% to 10.3%)                                        |  |
| Conflict and terrorism                          | 0<br>(0 to 0)                                                                                                                    | --                                                                | 0<br>(0 to 0)                           | -34.8%<br>(-40.3% to -28.9%)                                      | 0<br>(0 to 0)                           | -34.8%<br>(-40.3% to -28.9%)                                      |  |
| Executions and police conflict                  | 1<br>(1 to 2)                                                                                                                    | -8.4%<br>(-38.7% to 39.2%)                                        | 1<br>(0 to 0)                           | -5.6%<br>(-16.4% to 11.5%)                                        | 1<br>(1 to 2)                           | -7.8%<br>(-33.0% to 30.3%)                                        |  |
